1 **Scattered differentiation of unlinked loci across the genome underlines ecological**  
2 **divergence of the selfing grass *Brachypodium stacei***

3

4 Wenjie Mu<sup>a,b,c,1</sup>, Kexin Li<sup>a,1</sup>, Yongzhi Yang<sup>a,1</sup>, Adina Breiman<sup>b</sup>, Jiao Yang<sup>a</sup>, Ying Wu<sup>a</sup>, Shuang Wu<sup>a</sup>,  
5 MingjiaZhu<sup>a</sup>, Jianquan Liu<sup>a,2</sup>, Eviatar Nevo<sup>c,2</sup>, and Pilar Catalan<sup>d,2</sup>,

6

7 <sup>a</sup> State Key Laboratory of Herbage Innovation and Grassland Agro-Ecosystem, College of Ecology, Lanzhou  
8 University, Lanzhou 730000, China; <sup>b</sup>University of Tel-Aviv, Tel-Aviv 6997801, Israel; <sup>c</sup>Institute of Evolution,  
9 University of Haifa, Mount Carmel, Haifa 3498838, Israel. <sup>d</sup> Escuela Politecnica Superior de Huesca, Universidad  
10 de Zaragoza, Ctra. Cuarte km 1, 22071 Huesca, Spain

11

12 <sup>1</sup> W.M., K.L. and Y.Y. contributed equally to this work.

13 <sup>2</sup> Correspondence to be sent to: State Key Laboratory of Herbage Innovation and Grassland Agro-Ecosystem,  
14 College of Ecology, Lanzhou University, Lanzhou 730000, China Email: [liujq@nwipb.cas.cn](mailto:liujq@nwipb.cas.cn) (Jianquan Liu);  
15 University of Haifa, Mount Carmel, Haifa 3498838, Israel Email: [nevo@research.haifa.ac.il](mailto:nevo@research.haifa.ac.il) (EviatarNevo); and  
16 Escuela Politecnica Superior de Huesca, Universidad de Zaragoza, Ctra. Cuarte km 1, 22071 Huesca, Spain, Email:  
17 [pcatalan@unizar.es](mailto:pcatalan@unizar.es) (Pilar Catalán).

18

19

20 **Abstract**

21 Ecological divergence without geographic isolation, as an early speciation process that may  
22 lead finally to reproductive isolation through natural selection, remains one of the most  
23 interesting issues in evolutionary biology. However, the patterns of the underlying genetic  
24 divergences across the genome vary between different groups. Here we report that  
25 *Brachypodium stacei*, an inbreeding grass species, has been involved in sympatric ecological  
26 divergence without geographic isolation. Genomic, transcriptomic, and metabolomic analyses  
27 suggest that diploid *B. stacei* diverged sympatrically in two slopes with contrasting biomes at  
28 Evolution Canyon I (ECI), Mount Carmel, Israel, where gene flow has continued freely but  
29 reduced with the time. This ecological divergence involved the scattered divergence of many  
30 unlinked loci across the total genome that include both coding and non-coding regions. We also  
31 identified significantly differential expressions of ABA signaling pathway genes, and  
32 contrasting metabolome composition between the arid- vs forest-adapted *B. stacei* ECI  
33 populations. These results suggest that many small loci involved in environmental responses  
34 act additively to account for the ecological usages of this species in contrasted environments  
35 with gene flow.

36 **Keywords:** *Brachypodium stacei*, ecological divergence, functional genomics,  
37 metabolomics, multi-omics

38

39

40 **Significance**

41 Ecological divergence provides evidence for the origin of species through natural selection that  
42 has governed evolutionists' attention since Darwin. In this study, we present multiple-omics  
43 analyses of two plant populations growing sympatrically in contrasted environments and  
44 revealed their distinct differentiation across all examined data. These two populations share the  
45 most recent ancestor compared with other populations and their divergence started in the early  
46 Holocene. We revealed that gene flow had continued but with a progressive reduction over time.  
47 The genetic divergences are scattered across the total genome involving many unlinked coding  
48 and non-coding regions. These findings highlight the significance of natural selection in the  
49 ecological divergence that may finally lead to species formation without geographic isolation.  
50

## 51 **Introduction**

52       The adaptation of ancestral populations to contrasted environments has been assumed to  
53 trigger ‘the origin of the species’ as a major mechanism since Darwin (1). Under divergent  
54 selection, two populations accumulate multiple phenotypic and physiological traits to adapt to  
55 differentiated niches even in the presence of gene flow (2). This divergence at the same site  
56 may occur across different species which further highlights the critical role of such an  
57 ecological selection in speciation (3). Although many empirical studies of the sympatric  
58 diverging populations based on genomic data were conducted, the genetic bases of niche usage  
59 remain largely inconsistent (3). The ecological divergence may involve genetic differentiation  
60 across the total genome with many unlinked additive loci because of the continuous gene flow  
61 (4). However, large genomic islands containing a number of linked genes with obvious  
62 selection signals have been reported in ecological divergences of a few species in a similar  
63 manner without geographic isolation (5). This is expected to be more distinct in inbreeding  
64 species because of the strong purifying selection and reduced diversity (6).

65       “Evolution Canyon I” (ECI), near Mount Carmel in Israel, is well known among  
66 evolutionary biologists as a hotspot of ecological divergence for diverse organisms, from  
67 bacteria to plants and mammals (7). Although the overall climate and geology are essentially  
68 identical, the microclimates of the two slopes of ECI strongly differ, with the south-facing  
69 ‘African’ slope (AS) receiving up to 300% higher solar radiation than the north-facing  
70 ‘European’ slope (ES) (Fig 1A) (8). Thus, the AS has a xeric biome that is tropical, hot, dry,  
71 and savannoid, whereas the ES is temperate, cool, humid, and forested. It is estimated that these  
72 distinctive microclimates have existed since the Plio-Pleistocene (5.3 Mya — 11.7 Kya) (8).  
73 Evidence of ecological divergence that may lead to sympatric speciation has been found for  
74 seven species from diverse organismic groups that are distributed on both slopes of ECI (7),  
75 including the haploid soil bacterium *Bacillus simplex* (9), diploid fruit-fly *Drosophila*  
76 *melanogaster* (10), grain beetle *Oryzaephilus surinamensis* (11), spiny mouse *Acomysca*  
77 *hirinus* (12-14), and wild barley *Hordeum spontaneum* (15), and polyploid crucifer *Ricotia*  
78 *lunaria* (16) and wild emmer wheat *Triticum dicoccoides* (17). The genomic divergence  
79 observed between AS and ES populations of these organisms has been found to correspond

80 with allelic differentiation of genes that contribute to local adaptation to different environmental  
81 conditions.

82 Here, we explore genetic bases underlying ecological divergence of an inbreeding grass  
83 species, *Brachypodium stacei* ( $2n=2x=20$ ), which occurs on both the ES and AS in ECI (Fig.  
84 1). This is an arid species that is broadly distributed in the southern part of the circum-  
85 Mediterranean region (18-20) where it grows in shady warm places or in open habitats, usually  
86 protected by shrubs (21-22). Using high-quality genome assemblies for *B. stacei*, genome-  
87 resequencing data from populations at ECI and surrounding regions in Israel, together with  
88 transcriptomic and metabolomic data, we tested whether genomic divergence occurred between  
89 the ES and AS populations of diploid *B. stacei*. We then examined how the highly divergent  
90 genes are functionally related and distributed across the total genome in this species in ECI,  
91 and how this model grass contributes to increase the organismal and biological extent of the  
92 sympatric speciation evolutionary scenario.

93

## 94 **Results**

### 95 **Genomic assembly of *Brachypodium stacei* in ECI**

96 The genome size of *B. stacei* ECI was estimated to be 263.59 Mb (with a low heterozygosity  
97 of 0.09%), which is ~25Mb larger than the *B. stacei* reference genome ABR114 (Fig. S1). In  
98 order to make genomic analysis more reliable, an improved *de novo* assembly was generated  
99 for the *B. stacei* Bsta-ECI genome (Tables S1 and S2). The new *B. stacei* Bsta-ECI assembly  
100 had markedly higher contiguity than the current reference genome assembly *B. stacei* ABR114  
101 v. 1.1 (<https://phytozome-next.jgi.doe.gov/>) (22), with ~22.57Mb longer total contig length  
102 (256.71 Mb versus 234.17Mb), ~98.5% lower total contig numbers (79 versus 3,132), and ~44-  
103 fold higher N50 length (10.19 Mb vs 0.23 Mb) (Fig S2, Table S2). These high-quality contigs  
104 were further anchored onto 10 chromosomes assisted by 3D proximity information from Hi-C  
105 datasets (Table S3). The final genome assembly captured 248.99 Mb of the genome sequences,  
106 with 96.99% anchored percentages (Fig S3, Table S2). All chromosomes show longer sizes and  
107 fewer gaps than the reference genome ABR114 v. 1.1 (Table S4). The base call accuracy (QV)  
108 and assembly completeness were 39.78 and 99.18%, and Illumina pair-end reads mapping also

109 showed a > 98.5% mapping rate and coverage rate than in the Bsta-ECI genome assembly  
110 (Table S5). 98.6% of the BUSCO ortholog and homeolog genes could be completely predicted  
111 in Bsta-ECI, which were slightly higher than those in the previous assembly (Fig. S4). In  
112 addition, the LAI (LTR Assembly Index) of Bsta-ECI was higher than values for the previously  
113 reported ABR114 assembly (Fig. S2C), indicating that Bsta-ECI has higher long-terminal  
114 repeat (LTR) retrotransposon completeness. All assessments suggested high consistency and  
115 completeness of the Bsta-ECI genome assembly which showed great improvement in  
116 contiguity and repetitive sequence completeness compared with the reference genome assembly  
117 ABR114.

118 Around 103.46 Mb (40.31%) of the total *B. stacei* Bsta-ECI genome sequence was annotated  
119 as repetitive element sequences (Table S6), a percentage higher than that of the reference  
120 genome ABR114 (Table S7). Most of the repetitive element sequence is Transposable elements  
121 (TEs), which include SINE (~0.59%), LINE (~7.33%), LTR (~44.92%) and DNA (~17.91%)  
122 (Table S7). We further predicted 32,951 high-confidence protein coding genes in the *B. stacei*  
123 Bsta-ECI genome, slightly higher than those previously reported in ABR114 v. 1.1 (Fig. S4,  
124 Table S8). The gene structure feature (average CDS length, exon length, exon number, and intro  
125 length) are similar to those of the *B. stacei* ABR114 v. 1.1 and *B. distachyon* Bd21 reference  
126 genome (Fig. S5, Table S8). More than 97% of the predicted genes of the *B. stacei* Bsta-ECI  
127 genome had homologs in public functional databases (Table S9). We also found that 99.1%  
128 BUSCOs could be completely detected (Fig S4), indicating the high completeness of the gene  
129 model annotation. Furthermore, 1,838 transcription factors encoding genes, belonging to 67  
130 gene families representing 5.5% of the total predicted genes, were found in the *B. stacei* Bsta-  
131 ECI genome (Table S10). The high-quality chromosome-level assembly and annotation of our  
132 *B. stacei* Bsta-ECI genome (Fig 1B) provide robust foundations for investigating the  
133 evolutionary processes that gave rise to potential sympatric speciation events involving *B. stacei*  
134 in Evolution Canyon I.

135

## 136 **Genetic divergence of two *B. stacei* populations in ECI**

137 To explore the potential adaptive evolution of *B. stacei* in ECI, we subjected 46 *B. stacei*  
138 individuals (41 from ECI, 5 from other regions of Israel) to whole-genome resequencing (Fig.  
139 1A, 2A, DateSet S1). A total of 328.87 GB of clean Illumina data were obtained and mapped  
140 to the Bsta-ECI local reference genome, with an average of  $\sim 27\times$  coverage for each individual.  
141 More than 98.5% average mapping rate and average genome coverage were obtained for both  
142 AS and ES individuals, indicating high alignment accuracy (DataSet S2). After variant calling  
143 and quality filtering, 220,321 short INDELs and 722,351 high-quality SNPs were identified for  
144 downstream analysis (Table S11). The average INDEL and SNP densities were 0.89/kb and  
145 2.91/kb, respectively. We first constructed a maximum-likelihood (ML) phylogenetic tree  
146 (rooted with *B. distachyon* Bd30) to evaluate the relationships among *B. stacei* lineages. The  
147 phylogenetic tree separated the ECI individuals into two strongly supported clades (designated  
148 AS and ES), corresponding to their spatial distribution at ECI (Fig. 1A, 2A). The *B. stacei*  
149 lineages from other localities of Israel were resolved as either sister to the ECI clade or more  
150 distantly related, followed by the more divergent western and central Mediterranean lineages.  
151 Strong support was obtained for all main split nodes, and phylogenetic divergence tended to  
152 reflect overall geographic distances (Fig. 2A). The robust sister relationship between the two  
153 ECI populations indicates that the split was likely primary, rather than a result of secondary  
154 contact after allopatric divergence between geographically isolated populations (Figs. 1A, 2A).  
155 Principal component analysis (PCA) also showed that individuals collected from the ES slope  
156 clustered together and were separated from AS individuals along the first principal component  
157 axis (Fig. S6A). Population structure analysis for the best  $K=2$  hypothetical populations was  
158 also consistent with the ML tree and PCA results (Fig. 2A, Fig. S6B). Interestingly, we observed  
159 a few genomically admixed individuals in both AS and ES populations, suggesting that some  
160 gene flow may still occur between these spatially adjacent populations (Fig. 2A, Fig. S6B).

161 We identified 1,021 transposable elements (TE) that have polymorphism between AS and  
162 ES population, including 732 deletions and 289 insertions across all individuals (Fig. S7,  
163 DataSet S3). Besides, 13,811 structure variants (SVs) were also identified (Table S12). All of  
164 these genetic changes were found to occur sparsely across the total genome without linked

165 changes. A neighbor-joining tree and a PCA based, respectively, on SV data and transposable  
166 elements polymorphism (TEPs) also clearly distinguished the AS and ES populations from each  
167 other (Fig. S8), indicating that their divergence across the total genome may have involved  
168 ecological adaptation.

169 To further investigate the origins of the *B. stacei* AS and ES population at ECI we  
170 phylogenetically analyzed the maternally inherited plastomes of this species including samples  
171 from ECI, other regions of Israel, and other native Mediterranean locations. A maximum  
172 likelihood plastome gene tree rooted with *B. distachyon* Bd30 supported the strong monophyly  
173 of the ECI group (tandem plastome genes tree, Fig. S9A; full plastome tree, Fig. S9B), which  
174 was nested within a strongly supported ECI-Israel p. p. (*pro partim*) clade (Fig. S9). Within the  
175 ECI lineage, all ES samples were shown to be derived from one of the AS lineages (Fig. S9B)  
176 and a parsimony network of plastome haplotypes from the two slopes provided further support  
177 for this scenario (Fig 2B).

#### 178 **Demographic divergence of two *B. stacei* populations in ECI**

179 To reconstruct the most plausible evolutionary scenario of divergence between AS and ES  
180 populations of *B. stacei* in ECI, we simulated alternative demographic history models of the  
181 two populations using forward simulation and residuals analysis in *∂a∂i*. We tested seven  
182 models by fitting a site frequency spectrum (SFS) of the AS and ES populations (Fig. 2C, S10A).  
183 The best fitting model (based on likelihood and AIC values) suggested a single population  
184 divergence event with different reciprocal and asymmetric migration rates in two different time  
185 spans (T1 and T2; “asym\_mig\_twoepoch” model) (Fig. 2C, S10B, Table S13, S14). According  
186 to this model, the most recent common ancestor of the AS and ES populations split ~10.16 kya  
187 and had an estimated population size of 13,421 individuals. The first epoch (T1) lasted to the  
188 start of the second epoch (T2) ~3.04 kya, which lasted until the present, and the AS and ES  
189 populations had estimated populations sizes of 4,505 and 2,654 individuals, respectively (Fig.  
190 2C, Table S13). According to the model there were continuous and reciprocally asymmetric  
191 migrations between both populations in both time periods, with lower migration rates in the  
192 second period. These results suggest that continuous gene flow has occurred between the two  
193 populations, although gene flow decreased with divergence time (Fig. 2C, Table S14).



194 A similar distribution pattern of population nucleotide diversity ( $\pi$ ) in the AS population  
195 (mean  $\pi = 1.7893 \times 10^{-3}$ ) and ES population (mean  $\pi = 1.7810 \times 10^{-3}$ ) was observed ( $p = 0.861$ ,  
196 t-test) (Fig. S11), indicating that both populations maintained similar genetic diversity in their  
197 respective habitats. In addition, we detected similar genome-wide linkage disequilibrium (LD,  
198 indicated by  $r^2$  values) between individual genomes of the AS and ES populations (Fig. S12A).  
199 Half of the maximum  $r^2$  value indicated an average physical distance between SNPs of  $\sim 200$   
200 kb in the genomes of each population (Fig. S12A), a much longer LD decay distance compared  
201 with reported distances of other species (23-25). We also corroborated the high inbreeding rate  
202 of the *B. stacei* AS and ES ECI populations (inbreeding coefficient  $> 0.84$ ; selfing rate  $> 0.92$ ; Fig.  
203 S12B), as reported for other circum-Mediterranean populations based on molecular markers  
204 (26).

205 The estimated average genome-wide genetic divergence between the AS and ES  
206 populations, expressed in terms of fixation index ( $F_{ST}$ ) was  $\sim 0.336$  (Fig. 2D, Fig. S13). We  
207 detected some highly divergent regions ( $F_{ST} \approx 1$ ) between AS and ES populations (Fig. S13C,  
208 Dataset S4). We combined  $F_{ST}$  and genetic divergence ( $D_{XY}$ ) values to identify regions of the  
209 genome that were resistant to gene flow (Fig. 2D, Fig. S14). A total of 915 genes were identified  
210 from 6.06 Mb highly divergence genome regions at all chromosomes across the total genome  
211 (Fig. 2D, Dataset S5). We then explored whether these divergent alleles formed ‘genomic island’  
212 based on the top 5% of the  $F_{ST}$  and  $D_{XY}$  values through linked sweeping. We only recovered  
213 3.05Mb sequence of genome, which contained 5 ‘islands’  $> 70$ kb, 20 of 40-70kb and 100 of  
214  $\leq 30$ kb (Table S15), and three class islands scattered in all chromosomes (P-value = 0.4733,  
215 Fisher's exact test).

216 Some rice orthologs of these genes were found to be functionally related to reproduction  
217 (*UMA3*, *EPADI*, *TUB8*), plant-pathogen interactions (*NDPK1*, *NPR3*, *RacGEF1*), responses to  
218 abiotic stress (*Gnk2RLK-1*, *ZFP182*, *SITI*, *SRWD2*, *IRT1*), and cell-cycling (*CDKA2*) (Fig 2D).  
219 As a complement to the  $F_{ST}$  and  $D_{XY}$  approaches, we also applied Hudson-Kreitman-Aguadé  
220 (HKA) tests to identify genes under recent selection. We found that 546 genes (Dataset S6)  
221 involved in plants’ responses to abiotic stress were significantly enriched (Fig. S15, Dataset S7).  
222 For example, we discovered three fixed SNPs in the coding regions of *PIN3A* between AS and

223 ES populations, two of which were non-synonymous coding mutation sites. A homolog of this  
224 gene encodes a putative auxin efflux carrier in rice, and its over-expression can improve the  
225 drought tolerance of rice (27). In addition, rice orthologs of the genes *Sta2* (28), *HsfB2b* (29),  
226 and *PEXII-4* (30) reportedly contribute to salt or drought responses. The AS and ES  
227 polymorphisms in these abiotic stress response genes may reflect selective adaptation to their  
228 respective microhabitats. These analyses suggest that the genomic divergence between the two  
229 *B. stacei* populations from opposite slopes of ECI resulted from ongoing local adaptation to  
230 contrasting microhabitats, which may lead to incipient sympatric speciation in these  
231 populations.

232

### 233 **Transcriptomic and metabolomic divergence between AS and ES populations of *B. stacei***

234 To further elucidate potential mechanisms of local adaptation in AS and ES populations in  
235 ECI, we applied multiple-level comparisons. We first conducted drought experiments by  
236 growing individuals from AS and ES populations in both well-watered and drought conditions  
237 to simulate the contrasting ECI biomes. The above-ground plant phenotypes of AS and ES  
238 individuals were similar under well-watered conditions, but differed slightly under the drought  
239 treatment (Fig. 3A). Five physiological parameters differed significantly between plants grown  
240 in drought and well-watered conditions; transpiration rate (E), assimilation rate (A),  
241 intracellular carbon dioxide concentration (C<sub>i</sub>), and stomatal conductance (G<sub>sw</sub>) values were  
242 lower, while water use efficiency (WUE) values were higher, under drought than under watered  
243 conditions (Fig. S16). AS and ES individuals showed similar changing trends although the AS  
244 plants showed higher values in most cases.

245 To identify key genes in drought responses, RNA-seq analysis was applied and Pearson  
246 correlation coefficients showed good repeatability of gene expression profiles among replicates  
247 from each population (Fig. S17). We compared gene expression levels in leaf and root tissues  
248 from AS and ES plants grown under control (well-watered) and drought conditions, in both  
249 inter- and intra-population comparisons (Fig. 3B). In agreement with the observed phenotypic  
250 and physiological differences, numerous differentially expressed genes (DEGs) were detected  
251 between plants grown in the contrasting conditions in the intra-population comparisons (Fig.

252 3B). In total, 3,862 and 4,325 DEGs were identified in leaves and roots of ES individuals, and  
253 more (4,957 and 4,633 DEGs) in those of AS plants (Fig. 3B). Diverse Gene Ontology (GO)  
254 terms and KEGG pathways related to drought responses were enriched in sets of these DEGS  
255 in both AS and ES plants (Fig. S18, Dataset S8). 1,630 common DEGs in leaves and 1,423  
256 common DEGs in roots were identified in inter-population comparisons between AS and ES  
257 plants (Fig. S19). The Log<sub>2</sub> fold change (Lfc) values of these differentially expressed genes  
258 were similar for the AS and ES plants (Pearson correlation,  $R \geq 0.75$ ,  $p < 2.2e^{-16}$ ) (Fig. S20),  
259 suggesting that drought stress induced similar qualitative effects on the gene expression of leaf  
260 and root in the AS and ES individuals although their respective expression levels were  
261 significantly different.

262 Only 462 leaf DEGs and 992 root DEGs were identified from AS-ES inter-population  
263 comparisons under well-watered conditions (Fig. 3B), suggesting that gene expression is quite  
264 similar in both populations under well-watered conditions. In contrast, 2,493 leaf and 3,664  
265 root DEGs were identified from AS-ES inter-population comparisons under drought conditions,  
266 5.3-fold and 3.6-fold higher than numbers identified from corresponding comparisons of well-  
267 watered plants (Fig. 3B), suggesting potential differences in drought response mechanisms  
268 between individuals of the AS and ES populations. The observed dissimilarities in genome and  
269 transcriptome between AS and ES populations were mirrored by their respective metabolomes.  
270 We analyzed metabolite profiles of leaf and root tissues from AS and ES plants under drought  
271 conditions using Liquid Chromatography - Mass Spectrometry (LC-MS). In inter-population  
272 metabolome comparisons, 158 and 120 differential metabolites (DM) were identified in the leaf  
273 and root tissues, respectively. Orthogonal partial least-squares discriminant analysis (OPLS-  
274 DA) separated the AS and ES metabolomic profiles into two clusters, indicating that the  
275 metabolite profiles of AS and ES plants grown under drought conditions clearly differed (Fig.  
276 S21, Datasets S8). The DM data were consistent with the finding that KEGG biological  
277 pathways related to drought stress responses were significantly enriched in the DEGs of the AS  
278 and ES populations (Fig. S22, Datasets S8, S9). We further investigated the expression of genes  
279 directly related to drought and oxidative responses, several of which had different expression  
280 patterns in the AS and ES populations, for example, *DRO1*, *APX8*, and *ECK1* (Fig. S23). These

281 different combinations of gene expression and metabolite data suggest that AS and ES *B. stacei*  
282 populations respond discordantly to drought stress, likely as a consequence of distinct local  
283 adaptations to their contrasting microclimates.

284

### 285 **Key factors regulating microclimate adaptation in *B. stacei* ECI populations**

286 We investigated genes involved in the abscisic acid (ABA) signaling pathway with  
287 differing expression patterns in the AS and ES populations, as it is one of the main regulatory  
288 systems of plants, with broad effects, especially in abiotic stress responses. Catalysis of the  
289 transformation of 9-*cis*-epoxycarotenoids to xanthoxin, by 9-*cis*-epoxycarotenoid dioxygenases  
290 (NCEDs), is a key regulatory step in ABA biosynthesis (31). We found that a putative ortholog  
291 of rice *OsNCED1* (*B. staceiBsta14910*) (Table S16) showed high genetic divergence and  
292 expression changes between the AS and ES populations (Figs. 3C, 3D). In total, four SNPs  
293 located in the coding region of this gene corresponded to reciprocal synonymous amino acid  
294 mutations between the two populations (Fig. 3C). We also found 16 SNPs in the 5'-upstream  
295 2000 bp regulatory region of *Bsta13013*, all of which detected a high divergence between the  
296 two populations (Table S17). Three SNPs were fixed in the AS and ES populations, including  
297 one located 699 bp upstream of the start codon (Fig. 3C). Further analysis showed that this SNP  
298 was located between the TACGTG (ABRE) and TTGACC (W box) motifs (Fig. 3C), suggesting  
299 that these mutations may affect the transcription of *Bsta14910*, which was significantly  
300 overexpressed in leaf and root tissues of the AS samples compared to the ES samples (Fig. 3D).  
301 Other *NCED1* orthologs are involved in heat responses in rice (32) and *Lactuca sativa* (33),  
302 underscoring this gene's potential importance for adaptation to warm conditions.

303 We also found that exposure to drought induced stronger changes in the AS population  
304 than the ES population samples in expression of a gene encoding a serine/threonine protein  
305 kinase (*SAPK5*), which plays a key role in ABA signaling pathways activated by hyperosmotic  
306 stress (34) (Fig. S24). In addition, we identified a *Glossy1* *B. stacei* ortholog (*GLI-2*) with  
307 significantly higher expression patterns in the AS than ES populations samples (Fig. S25). This  
308 gene is induced by ABA and reportedly involved in wax biosynthesis, and thus may participate  
309 in important adjustments of the composition of leaf waxes that enhance resistance to abiotic

310 stressors, such as drought, ultraviolet light, and extreme temperatures (35). Together, these  
311 results suggest that differential expression of genes encoding key proteins involved in ABA  
312 signaling and wax synthesis may play important roles in different adaptations to local  
313 environments in the AS and ES populations. In addition, the changes of TEs may affect the  
314 expression of nearby gene through altering or creating regulatory element during ecological  
315 divergence (23). We identified 15 TE insertion polymorphisms (TIPs) that have different  
316 frequency between the two populations (Fig S7; DataSet S9) and nine genes were associated  
317 with them. Two genes (*Bsta12548* and *Bsta19483*) showed stable differential expressions  
318 between the two populations, being more highly expressed in AS than in ES samples in both  
319 tissues and conditions (Fig. S26). *Bsta12548* is involved in post-translational modification and  
320 protein turnover process while *Bsta19483* encodes a wall-associated receptor kinase (35).  
321 Therefore, mutations in regulatory motifs and coding regions of such genes and their targeting  
322 genes may also contribute to disconnected local adaptations and genetic divergence in the arid  
323 AS and mesic ES populations at ECI.

324

## 325 **Discussion**

326 Ecological divergence has been frequently reported for organisms living in ECI (see  
327 Dataset 10) because of the canyon's striking differences in microclimate and biomes (7, 8, 36).  
328 Diverse organisms, from bacteria to mammals and plants, have undergone ecological  
329 divergence in ECI, where the contrasting ecological conditions have promoted prezygotic  
330 and/or postzygotic reproductive isolation that may have led to the emergence of different  
331 species (8, 18, 37-39). Populations of some species (e.g., wild emmer wheat and spiny mouse)  
332 on the two slopes of ECI have been reproductively isolated through prezygotic (14, 18)  
333 (including differences in flowering time in plants and mate discrimination in animals) and  
334 postzygotic (19) isolation mechanisms (including chromosome re-arrangements (18) although  
335 not completely. In this study, we found that the ECI's contrasting microclimates have similarly  
336 fostered genomic, transcriptomic, and metabolomic divergence between two diploid inbreeding  
337 *B. stacei* populations at ECI (Figs. 2 and 3), suggesting ongoing divergence and further possible  
338 production of two species with complete reproductive isolation in the future.

339 Our population analysis of phylogenetically inherited plastomes showed that both AS and  
340 ES individuals shared a common maternal ancestor compared to other *B. stacei* accessions out  
341 of ECI (Fig. 2B, Fig S9), supporting that the two populations diverged *in situ* although we could  
342 not totally rule out the possibility that they diverged elsewhere and migrated to and survived at  
343 ECI. In addition, we found that ES individuals formed a sub-clade nested within the AS clade  
344 in a strongly supported ML plastome tree, suggesting that *B. stacei* established first in the AS  
345 and then later colonized the ES (Fig. S9). The lower divergence of recently expanded ES  
346 individuals compared to the larger divergence of more ancestral AS individuals was also  
347 supported by all nuclear genomic components (SNPs, SVs, TEPs; Figs. S6A, S8A, S8B). In  
348 previous evolutionary studies, both colonization scenarios from AS to ES and from ES to AS  
349 have been found (9, 11, 14, 18, 40-42), but our plastome data clearly support an AS to ES  
350 colonization scenario for *B. stacei* in ECI (Fig. 2B, Fig S9). Despite the non-reciprocally  
351 monophyletic clustering of individuals from each slope in the plastome tree, which is likely a  
352 reflection of colonization history, nuclear genome data also differentiated the two populations  
353 (Figs. 2A, S6, S8), suggesting that individuals of each population share their own genome  
354 variants. All of these analyses demonstrate that both populations have evolved as separate  
355 independent lineages.

356 Our demographic analyses suggest that the AS and ES populations of *B. stacei* diverged  
357 approximately 10,000 years ago, and gene flow gradually decreased with increasing divergence  
358 time (Fig. 2C, Fig. S10, Tables S13, S14). This finding supports the prediction that gradual  
359 divergence of two populations in contrasted habitats may lead to sympatric speciation (43). We  
360 found evidence of genetic divergence (mean  $F_{ST} = 0.33$ ) between the two populations that is  
361 higher than the genetic divergence observed in other plant and animal species that have  
362 undergone sympatric divergence at this site (11, 18). This may have resulted from the high  
363 inbreeding rates of *B. stacei* that promote selective fixtute during ecological stress (Fig. S12B)  
364 (26, 44). Our results further suggest that gene flow between AS and ES populations is mainly  
365 mediated by seed dispersal although inter-population pollen exchange may still occur in rare  
366 cases (Fig. 2B; Fig. S6B). Despite the continuous gene flow, we provided the clear evidence  
367 that the two populations of *B. stacei* sympatrically diverged in response to disruptive selection

368 pressures on the two slopes (43, 45). Individuals from the AS population have significantly  
369 more drought tolerance than those from the ES population, as evidenced by transcriptomic,  
370 metabolomic, and physiological trait analyses (Fig. 3, Figs. S16-S26). Functional genomic (46)  
371 and metabolomics (47) studies of the closely related species, *B. distachyon*, also found  
372 significantly greater induction of genes and metabolites important for drought stress responses  
373 in individuals adapted to arid conditions compared to those adapted to mesic conditions. These  
374 differences at multiple loci probably maintain sympatric separation of the two populations by  
375 facilitating divergent local adaptation to contrasting habitats.

376 The highly diverged and fixed in both coding and noncoding (TEs) alleles in frequencies  
377 between two populations were revealed to be distributed across all chromosomes of the *B. stacei*  
378 genome (Table S15, DataSet3). Only very few genes formed small ‘genomic islands’ through  
379 sweeping links, which is consistent with the experimental test of genomic divergence under  
380 ecological divergence with continuous and strong gene flow (4). However, this contrasts with  
381 the ecological divergence of a few species in the sympatric site in which the large-scale linked  
382 genomic divergences comprised the obvious ‘genomic islands’ within a few chromosomes (5)  
383 possibly due to micro-parapatric speciation with partly geographic isolation, or the second  
384 contacts after the initial allopatric divergence in other regions. In conclusion, our study provides  
385 robust sources from genomic, transcriptomic, and metabolomics analyses for the ecological  
386 divergence of two *B. stacei* populations with a most recent ancestor growing on the ECI  
387 opposite slopes. In addition, multiple unlinked loci may act additively to contribute to such an  
388 ecological divergence. These cumulative evidences support the initial sympatric speciation  
389 scenario of *B. stacei* in ECI as indicated by other studies (4, 48, 49).

390

## 391 **Materials and methods**

392 The genome was sequenced using a PacBio Sequel2 platform and assembled using NextDenovo.  
393 The whole-genome DNA re-sequencing data were generated by an Illumina HiSeq X Ten  
394 machine. Multiple alignment files were generated with BWA-MEM2 (v2.2.1). Population  
395 structure was analyzed using ADMIXTURE (v1.3.0). Phylogeny trees was constructed with  
396 IQ-TREE (v 1.6.12).  $F_{ST}$  and  $D_{XY}$  were calculated by Pixy. Transcriptome analysis was



397 conducted using the ‘HISAT2-Stringtie-DESeq’ pipeline. Detailed experiments and analyses  
398 are available in SI Appendix.

### 399 **Data availability**

400 The sequencing data are deposited at NCBI, the project number are PRJNA791186 and  
401 PRJNA791713, which can be accessed through URLs  
402 ([https://dataview.ncbi.nlm.nih.gov/object/PRJNA791186?reviewer=ivdf940cv986vs92hvu90](https://dataview.ncbi.nlm.nih.gov/object/PRJNA791186?reviewer=ivdf940cv986vs92hvu907vh07)  
403 [7vh07](https://dataview.ncbi.nlm.nih.gov/object/PRJNA791186?reviewer=ivdf940cv986vs92hvu907vh07)). The genome assembly and main script used in the analyses have been uploaded at  
404 Github ([https://github.com/Axolotl233/Brachypodium\\_SS](https://github.com/Axolotl233/Brachypodium_SS))

### 406 **Author contributions**

407 P.C. J.L., K.L., and E.N. designed the study. P.C. K.L. and A.B. conducted the sampling.  
408 W.M. and Y.Y. performed the experiments and the analyses. J.Y., Y.W., and M.Z.  
409 contributed to the analyses. P.C., J.L., E.N., W.M and wrote the manuscript. All authors read  
410 and commented on the manuscript.

### 412 **Acknowledgements**

413 All the computation works were supported by the Big Data Computing Platform for Western  
414 Ecological Environment and Regional Development, and the Supercomputing Center of  
415 Lanzhou University.

### 417 **Funding**

418 This study was supported by the Second Tibetan Plateau Scientific Expedition and Research  
419 (STEP) program (no. 2019QZKK0502 to LJQ) and PC (Pilar Cataln) was funded by the  
420 Spanish Ministry of Science and Innovation (grant no. PID2019-108195GB-I00), the Spanish  
421 Aragon Government (grant no. LMP82\_21), and the Spanish Aragon Government-European  
422 Social Fund Bioflora (grant no. A01-20R).

### 423 **References**

424 1. C. Darwin, On the origins of species (London, John Murray, 1859).



- 425 2. D. Schluter, Ecology and the origin of species. *Trends in Ecology and Evolution*. **16**, 372-  
426 380 (2001).
- 427 3. E. J. Richards, M. R. Servedio, C. H. Martin, Searching for sympatric speciation in the  
428 genomic era. *Bioessays*. **41**, e1900047 (2019).
- 429 4. M. E. Arnegard, *et al.*, Genetics of ecological divergence during speciation. *Nature*. **511**, 307-  
430 311 (2014).
- 431 5. N. Sun, *et al.*, Sympatric or micro-allopatric speciation in a glacial lake? Genomic islands  
432 support neither. *Natl Sci Rev*. **9**, nwac291 (2022).
- 433 6. T. E. Cruickshank, M. W. Hahn, Reanalysis suggests that genomic islands of speciation are  
434 due to reduced diversity, not reduced gene flow. *Molecular Ecology*. **23**, 3133-3157 (2014).
- 435 7. E. Nevo, “Evolution Canyons model: biodiversity, adaptation, and incipient sympatric  
436 ecological speciation across life: a revisit”. *New Horizons in Evolution*. pp. 291-348  
437 (Elsevier, 2021).
- 438 8. E. Nevo, Asian, African and European biota meet at ‘Evolution Canyon’ Israel: local tests of  
439 global biodiversity and genetic diversity patterns. *Proc. R. Soc. London. Ser. B Biol. Sci.*  
440 **262**, 149-155 (1995).
- 441 9. J. Sikorski, E. Nevo, Adaptation and incipient sympatric speciation of *Bacillus simplex*  
442 under microclimatic contrast at “Evolution Canyons” I and II, Israel. *Proc. Natl. Acad. Sci.*  
443 **102**, 15924-15929 (2005).
- 444 10. A. Korol, E. Rashkovetsky, K. Iliadi, E. Nevo, *Drosophila* flies in “Evolution Canyon” as  
445 a model for incipient sympatric speciation. *Proc. Natl. Acad. Sci.* **103**, 18184-18189  
446 (2006).
- 447 11. W. Hong, *et al.*, Genome-wide analysis revisits incipient sympatric and allopatric  
448 speciation in a beetle. *Isr. J. Ecol. Evol.* **67**, 69-80 (2020).
- 449 12. Y. Hadid, *et al.*, Sympatric incipient speciation of spiny mice *Acomys* at “Evolution  
450 Canyon,” Israel. *Proc. Natl. Acad. Sci.* **111**, 1043-1048 (2014).
- 451 13. K. Li, *et al.*, Transcriptome, genetic editing, and microRNA divergence substantiate  
452 sympatric speciation of blind mole rat, *Spalax*. *Proc. Natl. Acad. Sci.* **113**, 7584-7589  
453 (2016).

- 454 14. Y. Wang, *et al.*, Sympatric speciation of the spiny mouse from Evolution Canyon in Israel  
455 substantiated genomically and methylomically. *Proc. Natl. Acad. Sci.* **119**, e2121822119  
456 (2022).
- 457 15. E. Nevo, Evolution of wild barley at “Evolution Canyon”: adaptation, speciation, pre-  
458 agricultural collection, and barley improvement. *Isr. J. Plant Sci.* **62**, 22-32 (2015).
- 459 16. C. Qian, *et al.*, Transcriptomes divergence of *Ricotia lunaria* between the two micro-  
460 climatic divergent slopes at “Evolution Canyon” I, Israel. *Front. Genet.* 506 (2018).
- 461 17. H. Wang, *et al.*, Sympatric speciation of wild emmer wheat driven by ecology and  
462 chromosomal rearrangements. *Proc. Natl. Acad. Sci. U. S. A.* **117**, 5955-5963 (2020).
- 463 18. K. B. G. Scholthof, S. Irigoyen, P. Catalan, K. K. Mandadi, Brachypodium: A monocot  
464 grass model genus for plant biology. *Plant Cell.* **30**, 1673-1694 (2018).
- 465 19. D. López-Alvarez, *et al.*, Environmental niche variation and evolutionary diversification  
466 of the Brachypodium distachyon grass complex species in their native circum-  
467 Mediterranean range. *Am. J. Bot.* **102**, 1073-1088 (2015).
- 468 20. P. Catalan, D. López-Álvarez, A. Díaz-Pérez, R. Sancho, M. L. López-Herránz,  
469 “Phylogeny and evolution of the genus *Brachypodium*”. *Genetics and Genomics of*  
470 *Brachypodium*. pp. 9-38 (Springer, 2015).
- 471 21. P. Catalán, D. López-Álvarez, C. Bellosta, L. Villar, Updated taxonomic descriptions,  
472 iconography, and habitat preferences of *Brachypodium distachyon*, *B. stacei*, and *B.*  
473 *hybridum* (Poaceae). *Anales Jardín Botánico Madrid*. p. e028 (2016).
- 474 22. S. P. Gordon, *et al.*, Gradual polyploid genome evolution revealed by pan-genomic analysis  
475 of *Brachypodium hybridum* and its diploid progenitors. *Nat. Commun.* **11**, 1-16 (2020).
- 476 23. T. Ma, *et al.*, Ancient polymorphisms and divergence hitchhiking contribute to genomic  
477 islands of divergence within a poplar species complex. *Proc. Natl. Acad. Sci. U. S. A.* **115**,  
478 E236-E243 (2017).
- 479 24. D. Wu, *et al.*, Whole-genome resequencing of a worldwide collection of rapeseed  
480 accessions reveals the genetic basis of ecotype divergence. *Mol. Plant.* **12**, 30-43 (2019).

- 481 25. G. Jia, *et al.*, A haplotype map of genomic variations and genome-wide association  
482 studies of agronomic traits in foxtail millet (*Setaria italica*). *Nat. Genet.* **45**, 957-961  
483 (2013).
- 484 26. V. Shiposha, P. Catalán, M. Olonova, I. Marques, Genetic structure and diversity of the  
485 selfing model grass *Brachypodium stacei* (Poaceae) in western mediterranean: out of the  
486 iberian peninsula and into the islands. *PeerJ.* (2016).
- 487 27. Q. Zhang, *et al.*, The putative auxin efflux carrier OsPIN3t is involved in the drought  
488 stress response and drought tolerance. *Plant J.* **72**, 805-816 (2012).
- 489 28. M. Kumar, J. Choi, G. An, S. R. Kim, Ectopic expression of OsSta2 enhances salt stress  
490 tolerance in rice. *Front. Plant Sci.* **8**, 316 (2017).
- 491 29. J. Xiang, *et al.*, Heat shock factor OsHsfB2b negatively regulates drought and salt  
492 tolerance in rice. *Plant Cell Rep.* **32**, 1795-1806 (2013).
- 493 30. P. Cui, *et al.*, OsPEX11, a peroxisomal biogenesis factor 11, contributes to salt stress  
494 tolerance in *Oryza sativa*. *Front. Plant Sci.* **7**, 1357 (2016).
- 495 31. E. Nambara, A. Marion-Poll, Abscisic acid biosynthesis and catabolism. *Annu. Rev. Plant*  
496 *Biol.* **56**, 165-185 (2005).
- 497 32. H. Zhou, *et al.*, Comparative analysis of heat-tolerant and heat-susceptible rice highlights  
498 the role of OsNCED1 gene in heat stress tolerance. *Plants.* **11**, 1062 (2022).
- 499 33. H. Huo, P. Dahal, K. Kunusoth, C. M. McCallum, K. J. Bradford, Expression of 9-cis-  
500 EPOXYCAROTENOID DIOXYGENASE4 is essential for thermoinhibition of lettuce  
501 seed germination but not for seed development or stress tolerance. *Plant Cell.* **25**, 884–  
502 900 (2013).
- 503 34. Y. Kobayashi, S. Yamamoto, H. Minami, Y. Kagaya, T. Hattori, Differential activation of  
504 the rice sucrose nonfermenting1-related protein kinase2 family by hyperosmotic stress  
505 and abscisic acid. *Plant Cell.* **16**, 1163-1177 (2004).
- 506 35. M. A. Islam, H. Du, J. Ning, H. Ye, L. Xiong, Characterization of Glossyl-homologous  
507 genes in rice involved in leaf wax accumulation and drought resistance. *Plant Mol. Biol.*  
508 **70**, 443-456 (2009).

- 509 36. T. Pavlíček, D. Sharon, V. Kravchenko, H. Saaroni, E. Nevo, Microclimatic interslope  
510 differences underlying biodiversity contrasts in " Evolution Canyon", Mt. Carmel, Israel.  
511 *Isr. J. Earth Sci.* **52** (2003).
- 512 37. Y. Hadid, *et al.*, Possible incipient sympatric ecological speciation in blind mole rats  
513 (*Spalax*). *Proc. Natl. Acad. Sci.* **110**, 2587-2592 (2013).
- 514 38. K. Li, *et al.*, Sympatric speciation revealed by genome-wide divergence in the blind mole  
515 rat *Spalax*. *Proc. Natl. Acad. Sci.* **112**, 11905-11910 (2015).
- 516 39. K. Li, *et al.*, Genome evolution of blind subterranean mole rats: adaptive peripatric versus  
517 sympatric speciation. *Proc. Natl. Acad. Sci.* **117**, 32499-32508 (2020).
- 518 40. P. L. Morrell, D. M. Toleno, K. E. Lundy, M. T. Clegg, Low levels of linkage  
519 disequilibrium in wild barley (*Hordeum vulgare* ssp. *spontaneum*) despite high rates of  
520 self-fertilization. *Proc. Natl. Acad. Sci. U. S. A.* **102**, 2442-2447 (2005).
- 521 41. S. Hübner, *et al.*, Genome differentiation of *Drosophila melanogaster* from a  
522 microclimate contrast in Evolution Canyon, Israel. *Proc. Natl. Acad. Sci.* **110**, 21059-  
523 21064 (2013).
- 524 42. L. Kang, *et al.*, Genomic divergence and adaptive convergence in *Drosophila simulans*  
525 from Evolution Canyon, Israel. *Proc. Natl. Acad. Sci.* **116**, 11839-11844 (2019).
- 526 43. D. I. Bolnick, B. M. Fitzpatrick, Sympatric speciation: models and empirical evidence.  
527 *Annu. Rev. Ecol. Evol. Syst.* **38**, 459-487 (2007).
- 528 44. V. Shiposha, *et al.*, Multiple founder events explain the genetic diversity and structure of  
529 the model allopolyploid grass *Brachypodium hybridum* in the Iberian Peninsula hotspot.  
530 *Ann. Bot.* **125**, 625-638 (2020).
- 531 45. E. Nevo, "Evolution Canyon," a potential microscale monitor of global warming across  
532 life. *Proc. Natl. Acad. Sci. U. S. A.* **109**, 2960-2965 (2012).
- 533 46. M. A. Decena, *et al.*, Comparative genomics, evolution, and drought-induced expression  
534 of dehydrin genes in model *Brachypodium* grasses. *Plants.* **10**, 2664 (2021).
- 535 47. L. H. C. Fisher, *et al.*, Linking dynamic phenotyping with metabolite analysis to study  
536 natural variation in drought responses of *Brachypodium distachyon*. *Front. Plant Sci.* **7**,  
537 1751 (2016).

538 48. V. Savolainen, *et al.*, Sympatric speciation in palms on an oceanic island. *Nature*. **441**, 210-  
539 213 (2006).

540 49. M. Barluenga, K. N. Stolting, W. Salzburger, M. Muschick, A. Meyer, Sympatric speciation  
541 in Nicaraguan crater lake cichlid fish. *Nature*. **439**, 719-723 (2006).

542

543

544

545

546

547

548

549

550

551

552

553

554

555

556

557

558

559

560

561

562

563

564 **Figure legends**

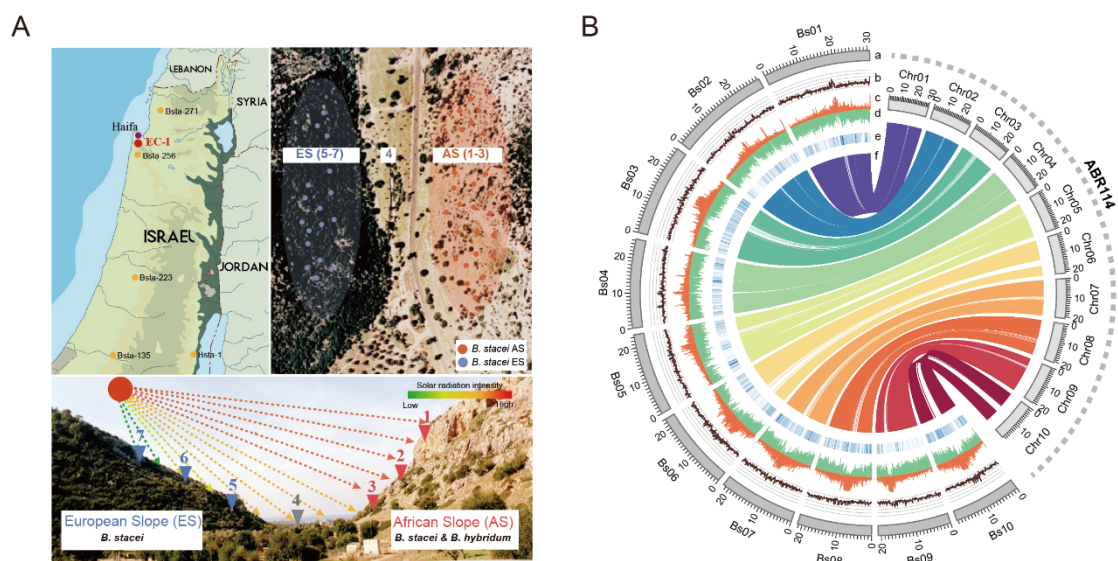

566 **Figure 1. Sampling and genome organization of *Brachypodium stacei* ECI.** **A)** Sampling  
567 locations of *B. stacei* in Evolution Canyon I (ECI) and other sites in Israel. Left-most panel:  
568 populations of *B. stacei* from ECI (red) and elsewhere in Israel (yellow). Right-most panel:  
569 populations of *B. stacei* ECI from the ‘European Slope’ (ES) (blue) and the ‘African Slope’  
570 (AS) (salmon). Bottom panel: Despite being only 100-250 m apart in linear distance, these ES  
571 and AS slopes have strongly contrasted microclimates (e. g., solar radiation intensity differs  
572 substantially between them). **B).** Overview of the newly assembled *B. stacei* genome from  
573 Evolution Canyon I (BstaECI, left) and syntenic relationships to the current *B. stacei* ABR114  
574 v.1.1 reference genome (right). The tracks indicate: (a) chromosomes (Bs01-Bs10, BstaECI;  
575 JGI01-JGI10, ABR114), (b) GC contents, (c) transposable element densities, (d) gene models  
576 densities, (e) single nucleotide polymorphism (SNP) densities, and (f) collinearity of syntenic  
577 genes (BstaECI vs ABR114).

578

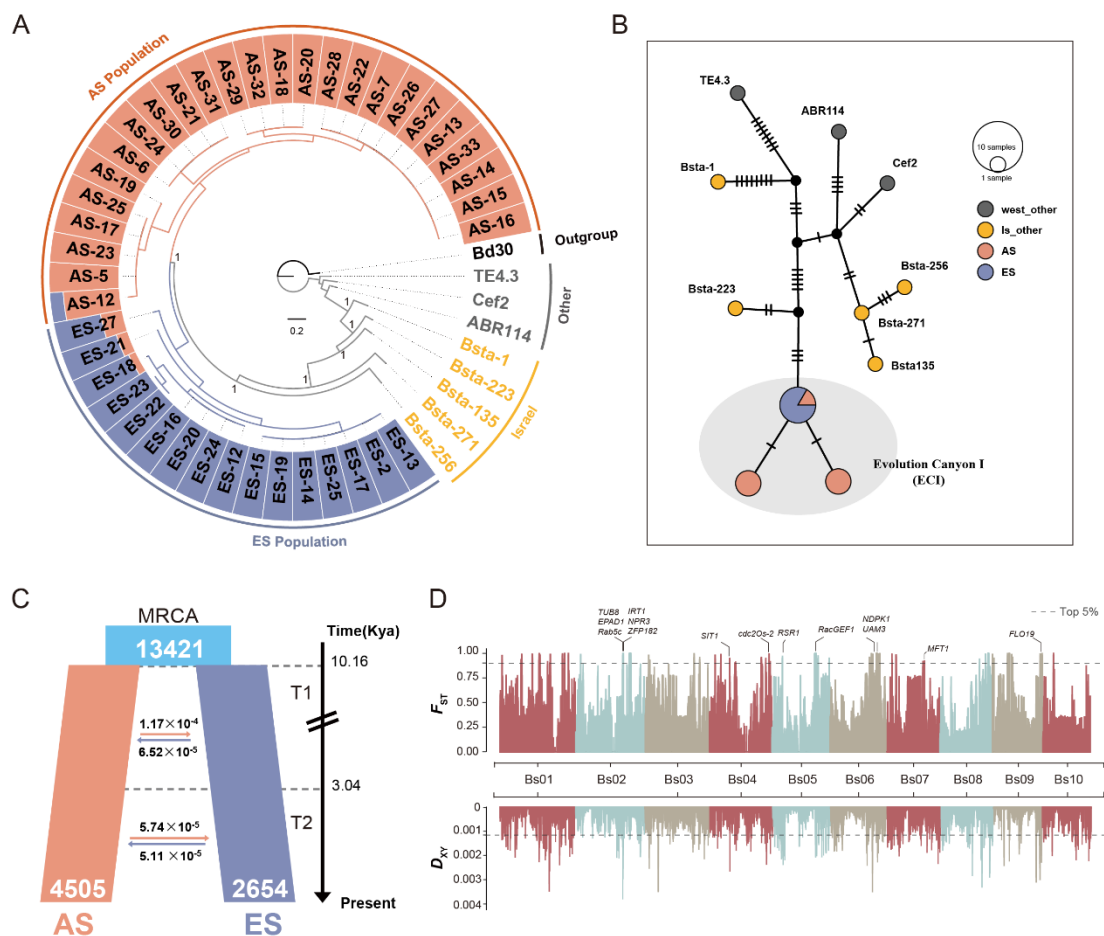

579

580 **Figure 2. Genome divergence of *Brachypodium stacei* resequenced accessions from**  
 581 **Evolution Canyon (ECI).** **A)** Maximum-likelihood phylogenetic tree of the *B. stacei*  
 582 accessions based on high-quality SNP data from individual genomes of *B. stacei* [AS  
 583 (salmon), ES (blue), Israel (yellow), and other western and central Mediterranean populations  
 584 (gray)], rooted with *B. distachyon* Bd30. The tree's outer ring displays the population  
 585 structure (with optimal K=2) of the *B. stacei* AS and ES populations. **B)** Statistical parsimony  
 586 plastome haplotype network of *B. stacei* samples from Israel and other Mediterranean  
 587 localities. The area of each circle in the network is proportional to the haplotype frequency,  
 588 and the number of mutational steps between two nodes is indicated by short bars) **C)**  
 589 Demographic history of the *B. stacei* AS and ES populations inferred by the best fit  $\hat{d}a\hat{d}i$   
 590 model ("asym\_mig\_twoepoch" model), indicating that a single split of the ancestral  
 591 population (MRCA; light blue) 10.16 Ka gave rise to the modern AS and ES populations. The  
 592 reciprocal average migration rates between ES and AS populations in two temporal epochs  
 593 (T1 and T2) are shown by horizontal arrows and the estimated ages of T1 and T2 on the right

594 side of the panel. **D)** Genetic differentiation and divergence between the *B. stacei* AS and ES  
595 populations revealed by  $F_{ST}$  and  $D_{XY}$  data. Dashed horizontal lines depict the top 5%  
596 thresholds ( $F_{ST}$  0.92,  $D_{XY}$  0.0011), and rice ortholog functional genes located in highly  
597 divergent regions are marked on the respective chromosomes.  
598



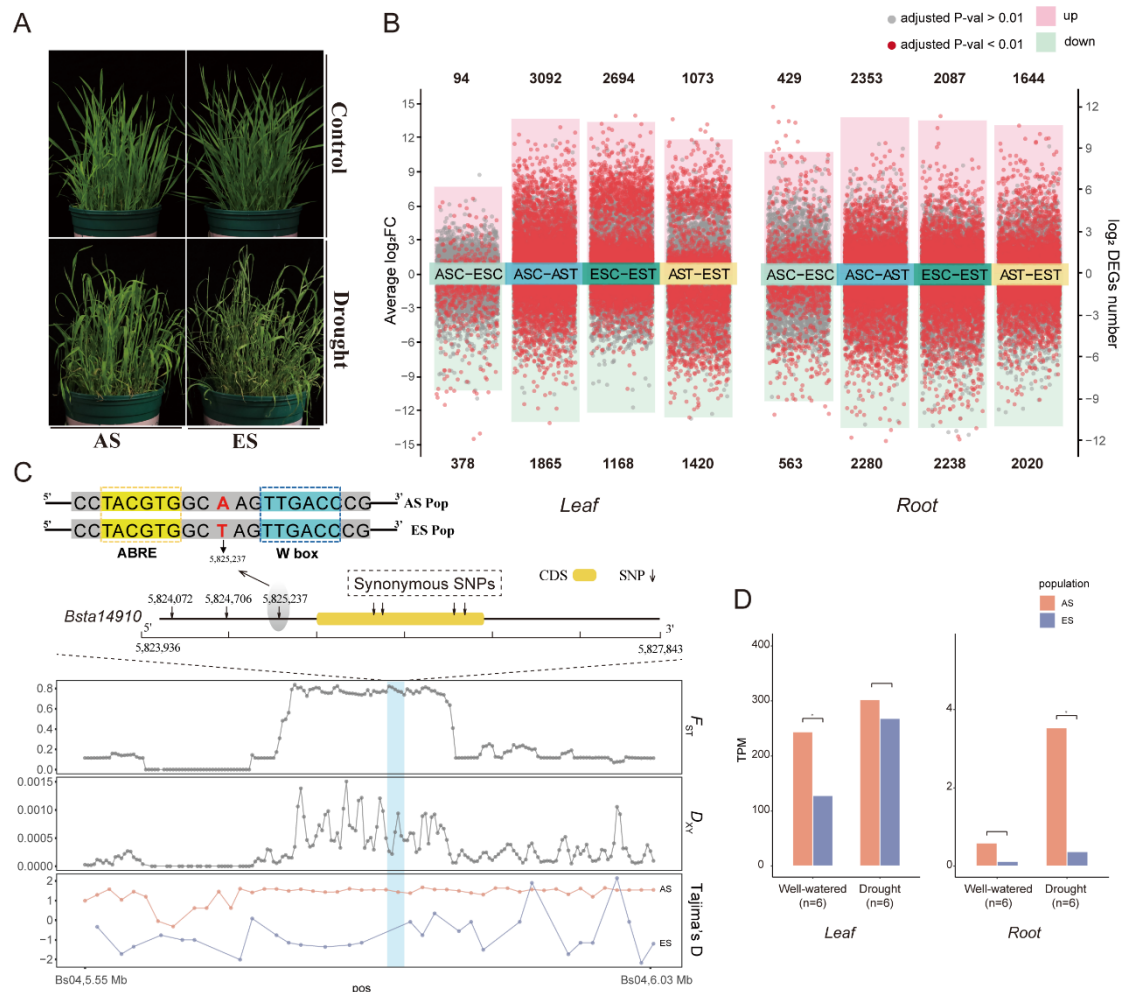

599

600 **Figure 3. Phenotypic, transcriptomic, and genetic responses related to drought stress**  
 601 **conditions of *Brachypodium stacei* plants from AS and ES populations. A)** Above-ground  
 602 phenotypes of plants from AS and ES populations grown under drought and well-watered  
 603 (control) conditions. **B)** Up-regulated and down-regulated differentially expressed genes  
 604 (DEGs) in leaf and root tissues from intra- and inter- AS and ES population comparisons;  
 605 adjusted p-values < 0.01 and > 0.01 are indicated by red and gray dots, respectively. **C)** Genetic  
 606 structure and SNP variants located between +/- 2 kbp (upstream and downstream) of gene  
 607 *Bsta14910* (ortholog of rice OsNCED1) in chromosome Bs04. Population parameters  $F_{ST}$ ,  $D_{XY}$ ,  
 608 and Tajima's D of AS and ES populations. The bright blue bar in the plots represents the  
 609 windows containing *Bsta14910* and its polymorphisms. **D)** Comparative differential expression  
 610 of *Bsta14910* in leaf and root tissues of AS and ES individuals under control (well-watered) vs  
 611 treatment (drought) conditions. Values represent transcripts per million (TPM), \*p-value < 0.05  
 612 (Wilcoxon rank sum test).
